# Supplementary material
Source: MDPI journal article supplement (https://www.mdpi.com/2073-4441/11/11/2247)
Supplement: s1 [file s1]

# Anthropogenic Effects on Hydrogeochemical Characterization of the Shallow Groundwater in an Arid Irrigated Plain in Northwestern China

Luchen Wang, Yi Mei, Kun Yu, Ying Li, Xuchen Meng and Fusheng Hu

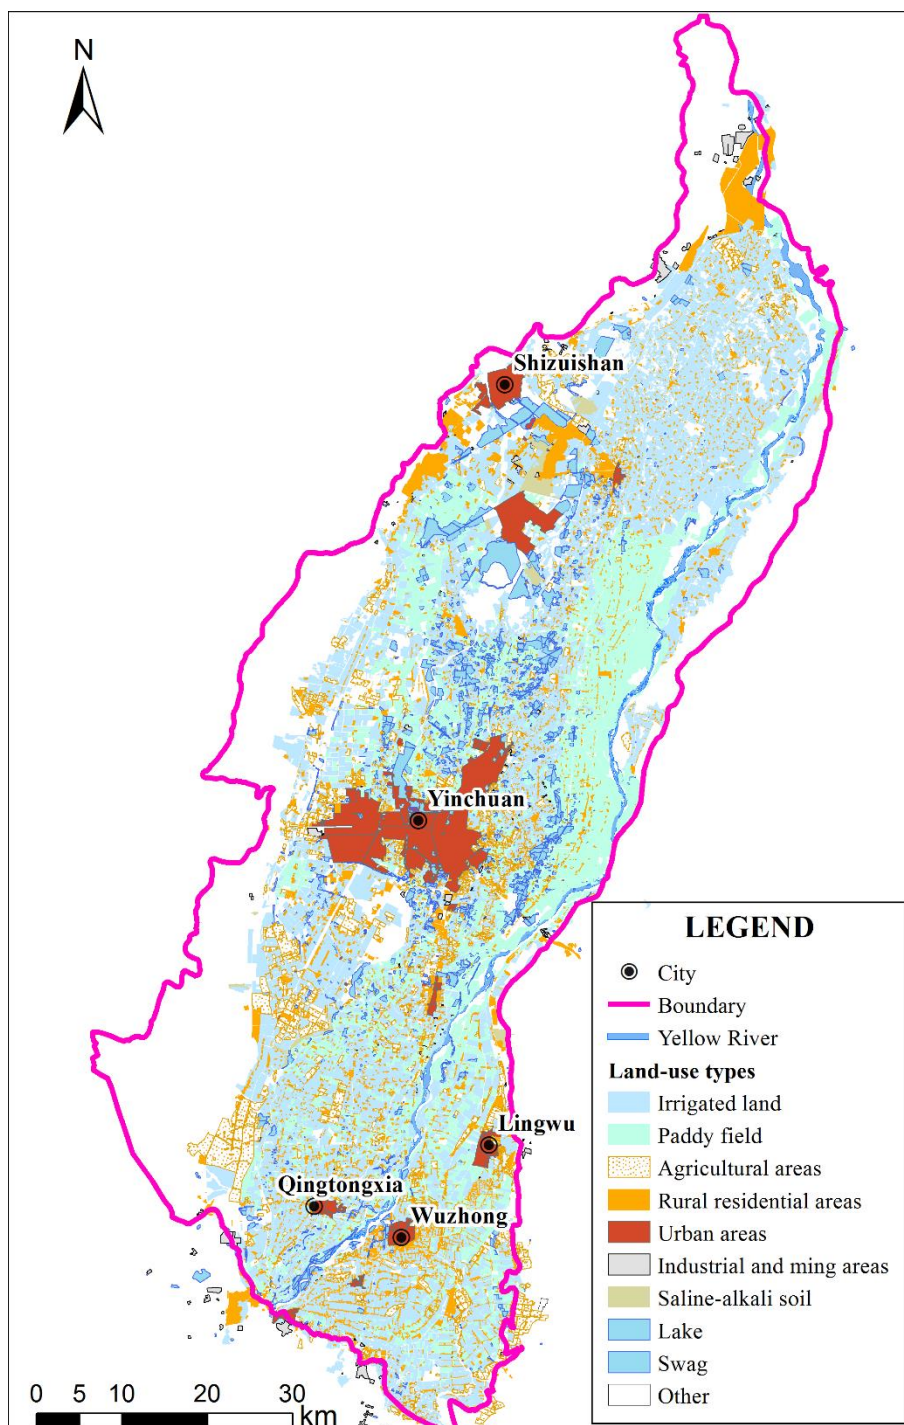

Figure S1. Map of land use types in the study area.
